# Supplementary material for: Improving photoelectrochemical response of ZnO nanowire arrays by coating with p-type ZnO-resembling metal–organic framework
Source: Royal Society of Chemistry journal article supplement (doi:10.1039/c9dt01490j), 2019-01-01
Supplement: c9dt01490j1.pdf [file c9dt01490j1.pdf]

## Supplementary Information

### **Improving Photoelectrochemical Response of ZnO Nanowire Arrays by Coating with p-Type ZnO-Resembling Metal–Organic Framework**

Qianqian Gao, Huihui Kang, Yun Cai, Daxiang Xue, Fengjiao Yu, Jun Fang and Yang Yang\*

State Key Laboratory of Materials-Oriented Chemical Engineering, College of Chemical  
Engineering, Nanjing Tech University, Nanjing 210009, China

\* Corresponding Author; Email: [yangy@njtech.edu.cn](mailto:yangy@njtech.edu.cn)

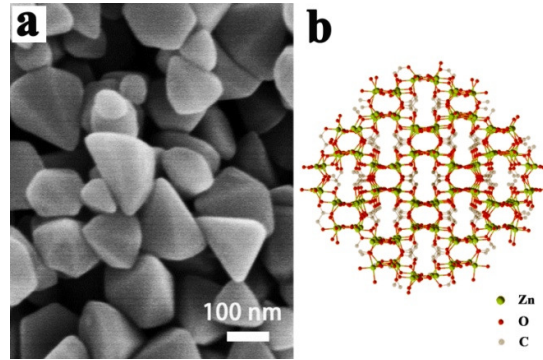

**Fig. S1** (a) SEM image of the Zn-GA crystalline powders; (b) Illustration of the Zn–O network embedded in Zn-GA.

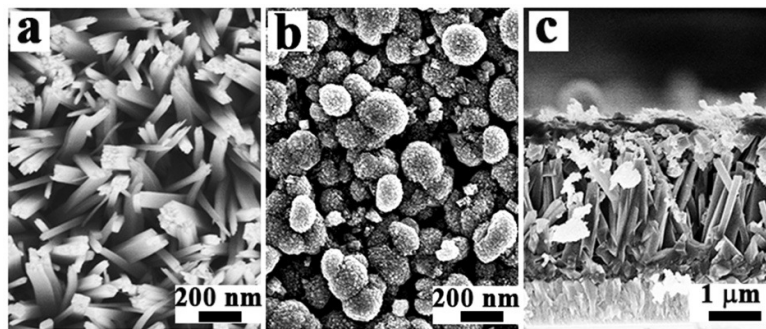

**Fig. S2** SEM top view of (a) TiO<sub>2</sub> NWAs and (b) TiO<sub>2</sub>@Zn-GA-5 NWAs; (c) SEM cross-sectional view of TiO<sub>2</sub>@Zn-GA-5 NWAs.

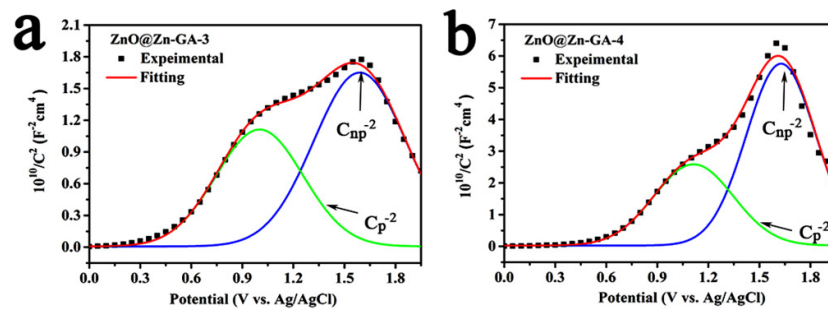

**Fig. S3** The measured and fitted M–S plots of (a) ZnO@Zn-GA-3 NWAs and (b) ZnO@Zn-GA-4 NWAs at a frequency of 3 kHz in the dark.

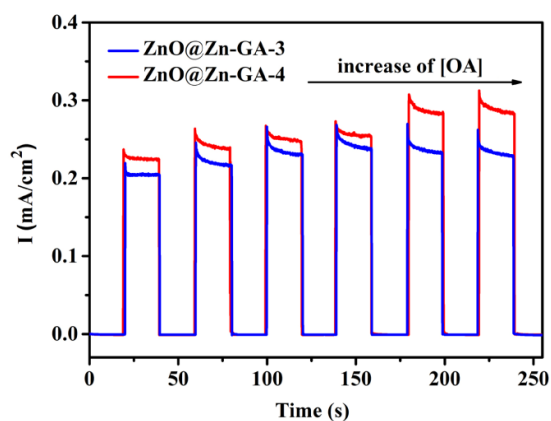

**Fig. S4** Photocurrent response curves of ZnO@Zn-GA-3 NWAs and ZnO@Zn-GA-4 NWAs in the presence of OA with concentrations starting from 0 to 50  $\mu\text{M}$  at a 10  $\mu\text{M}$  interval at bias of 0.5 V vs. Ag/AgCl.

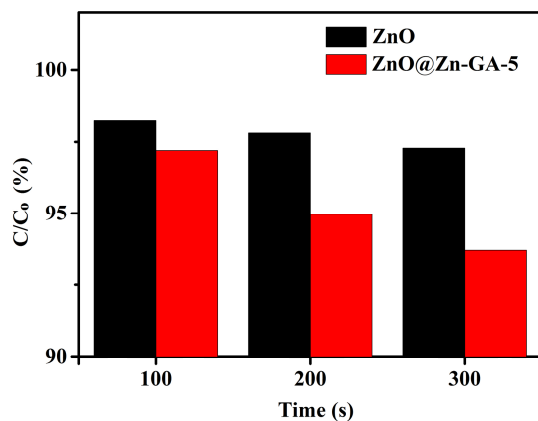

**Fig. S5** PEC degradation of OA (70  $\mu\text{M}$ ) by primary ZnO NWAs and ZnO@Zn-GA-5 NWAs. The concentration of residual OA in the electrolyte solution was determined by monitoring the absorbance intensity of OA at 190 nm.
